# Supplementary material for: Structural Protein Effects Underpinning Cognitive Developmental Delay of the PURA p.Phe233del Mutation Modelled by Artificial Intelligence and the Hybrid Quantum Mechanics–Molecular Mechanics Framework
Source: MDPI journal article supplement (doi:10.3390/brainsci12070871), 2022-06-30
Supplement: s1 [file s1]

## Article

# Structural Protein Effects Underpinning Cognitive Developmental Delay of the *PURA* p.Phe233del Mutation Modelled by Artificial Intelligence and the Hybrid Quantum Mechanics–Molecular Mechanics Framework

Juan Javier López-Rivera <sup>1,2,\*</sup> , Luna Rodríguez-Salazar <sup>3</sup>, Alejandro Soto-Ospina <sup>4</sup> , Carlos Estrada-Serrato <sup>2</sup>, David Serrano <sup>2</sup>, Henry Mauricio Chaparro-Solano <sup>2</sup> , Olga Londoño <sup>2</sup>, Paula A. Rueda <sup>3</sup>, Geraldine Ardila <sup>3</sup>, Andrés Villegas-Lanau <sup>4,5</sup>, Marcela Godoy-Corredor <sup>6</sup>, Mauricio Cuartas <sup>7</sup>, Jorge I. Vélez <sup>8</sup> , Oscar M. Vidal <sup>8</sup> , Mario A. Isaza-Ruget <sup>1</sup> and Mauricio Arcos-Burgos <sup>9,\*</sup> 

<sup>1</sup> INPAC Research Group, Fundación Universitaria Sanitas, Bogotá 111321, Colombia

<sup>2</sup> Grupo de Genética Médica, Clínica Universitaria Colombia y Clínica Pediátrica Colsanitas, Bogotá 111321, Colombia

<sup>3</sup> Grupo de Bioinformática, Laboratorio de Clínica Colsanitas, Bogotá 110221, Colombia

<sup>4</sup> Genética Molecular (GenMol), Facultad de Ciencias Exactas y Naturales, Universidad de Antioquia, Medellín 050012, Colombia

<sup>5</sup> Grupo de Neurociencias de Antioquia (GNA), Facultad de Medicina, Universidad de Antioquia, Medellín 050012, Colombia

<sup>6</sup> Laboratorio Clínico y de Patología, Clínica Colsanitas, Bogotá 110221, Colombia

<sup>7</sup> Grupo de Investigación Estudios en Psicología, Departamento de Psicología, Escuela de Humanidades, Universidad EAFIT, Medellín 050022, Colombia

<sup>8</sup> Universidad del Norte, Barranquilla 080001, Colombia

<sup>9</sup> Grupo de Investigación en Psiquiatría (GIPSI), Departamento de Psiquiatría, Instituto de Investigaciones Médicas, Facultad de Medicina, Universidad de Antioquia, Medellín 050012, Colombia

\* Correspondence: jjlopez@colsanitas.com (J.J.L.-R.); mauricio.arcos@udea.edu.co (M.A.-B.)

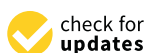

**Citation:** López-Rivera, J.J.; Rodríguez-Salazar, L.; Soto-Ospina, A.; Estrada-Serrato, C.; Serrano, D.; Chaparro-Solano, H.M.; Londoño, O.; Rueda, P.A.; Ardila, G.; Villegas-Lanau, A.; et al. Structural Protein Effects Underpinning Cognitive Developmental Delay of the *PURA* p.Phe233del Mutation Modelled by Artificial Intelligence and the Hybrid Quantum Mechanics–Molecular Mechanics Framework. *Brain Sci.* **2022**, *12*, 871. <https://doi.org/10.3390/brainsci12070871>

Academic Editors: Andrew Chih Wei Huang, Seong Soo A. An, Bai Chuang Shyu, Muh-Shi Lin and Anna Kozłowska

Received: 19 May 2022

Accepted: 24 June 2022

Published: 30 June 2022

**Publisher's Note:** MDPI stays neutral with regard to jurisdictional claims in published maps and institutional affiliations.

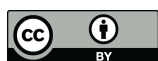

**Copyright:** © 2022 by the authors. Licensee MDPI, Basel, Switzerland. This article is an open access article distributed under the terms and conditions of the Creative Commons Attribution (CC BY) license (<https://creativecommons.org/licenses/by/4.0/>).

## Supplementary Figures

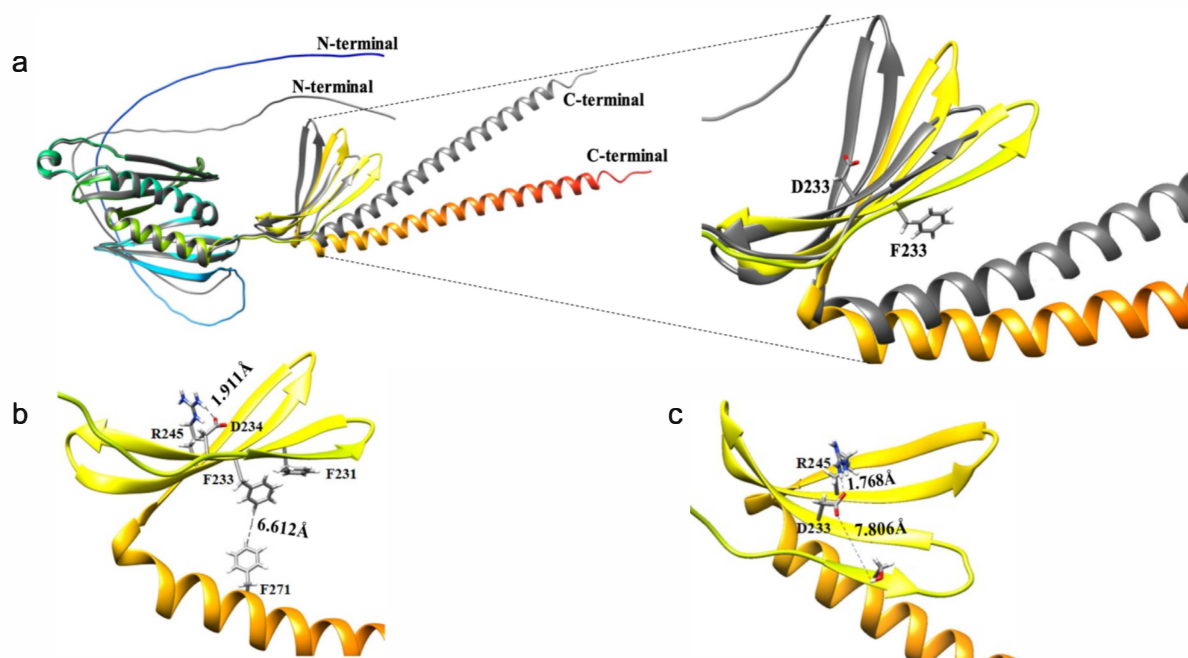

**Figure S1.** 3D analysis of PURAwt and PURA-Phe233del. **(a)** Needleman Wunsch global alignment for PURAwt (Rainbow) and PURA-Phe233del (Gray); **(b)** PURA wt protein region at 233; **(c)** PURA Phe233del protein region.

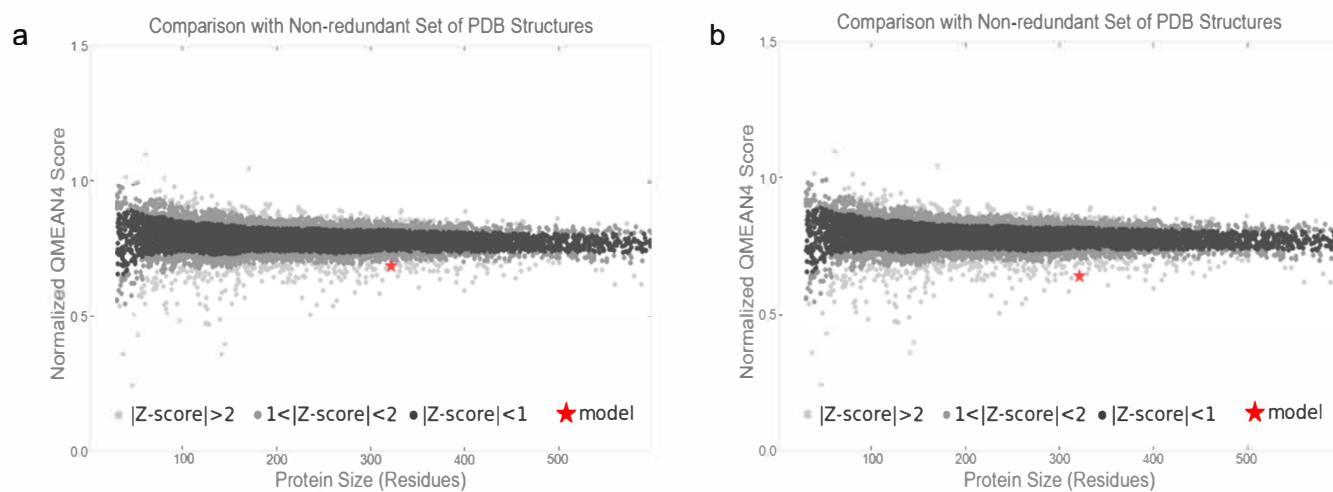

**Figure S2.** Z-score comparison diagram of experimentally solved structures for the (a) PURA wild type and (b) PURA Phe233del.

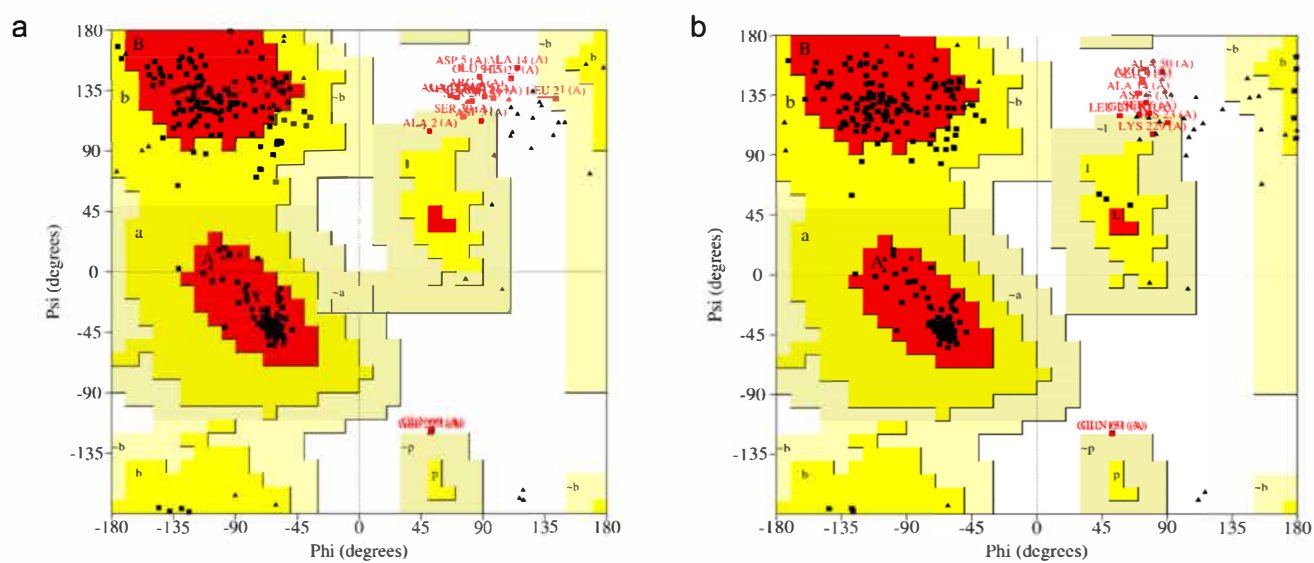

**Figure S3.** Ramachandran plots for the (a) PURAwt and (b) PURA-Phe233del using Procheck software.

## Supplementary Tables

**Table S1.** NGS quality parameters.

| Predictor DreamGenigs/ACMG Classification         | Pathogenic                                  |
|---------------------------------------------------|---------------------------------------------|
| Gene                                              | <i>PURA</i>                                 |
| Chr                                               | 5                                           |
| Coordinate                                        | 139494455                                   |
| Ref                                               | GCTT                                        |
| Alt                                               | G                                           |
| c.Hgvs                                            | c.697_699del                                |
| p.Hgvs                                            | p.Phe233del                                 |
| Protein Effect                                    | INFRAME                                     |
| Transcrito                                        | NM_005859.5                                 |
| Region                                            | EXON                                        |
| Zygosity/Father/Mother/Daughter                   | HOMZ_REF   HOMZ_REF   HETZ_ALT              |
| Inheritance                                       | AD                                          |
| Coverage/Father/Mother/Daughter                   | 165   145   162                             |
| Frequency/Alternate Allele/Father/Mother/Daughter | 0   0   0.45679                             |
| Alt Count/Father/Mother/Daughter                  | 0   0   74                                  |
| ID dbSNP                                          | rs786204835                                 |
| Max Allele Freq                                   | -                                           |
| Max Allele Freq Origin                            | -                                           |
| ACMG/Criteria                                     | PS2+PM2+PP5                                 |
| Phenotype OMIM/Additional, Information            | Mental retardation, autosomal dominant 31 / |
| MIM Number                                        | 600473                                      |

|           |                                                                                                                                                                                                                                                                                                                                                                                                       |
|-----------|-------------------------------------------------------------------------------------------------------------------------------------------------------------------------------------------------------------------------------------------------------------------------------------------------------------------------------------------------------------------------------------------------------|
| HPO Terms | Delayed myelination / Absent speech / Feeding difficulties / Intellectual disability / Open mouth / Seizures / CNS hypomyelination / Autosomal dominant inheritance / Strabismus / Neonatal hypotonia / Myopathic facies / Respiratory insufficiency / Global developmental delay / Variable expressivity / Prominent forehead / Myoclonus / Broad-based gait / High palate / Telecanthus / Nystagmus |
|-----------|-------------------------------------------------------------------------------------------------------------------------------------------------------------------------------------------------------------------------------------------------------------------------------------------------------------------------------------------------------------------------------------------------------|

**Table S2.** Energetic and stereochemical characterization of the models.

| Model             | Software   | QMEAN6 | Z-score | Errat | Ramachandran Plot                   |
|-------------------|------------|--------|---------|-------|-------------------------------------|
| PURA wt           | AlphaFold2 | 0.61   | -2.41   | 93.89 | Favoured region: 219 (84.6%)        |
|                   |            |        |         |       | Allowed region: 23 (8.9%)           |
|                   |            |        |         |       | Generously allowed region: 4 (1.5%) |
|                   |            |        |         |       | Disallowed region: 13 (5.0%)        |
| PURA<br>Phe293del | AlphaFold2 | 0.59   | -3.60   | 89.66 | Favoured region: 216 (83.7%)        |
|                   |            |        |         |       | Allowed region: 30 (11.6%)          |
|                   |            |        |         |       | Generously allowed region: 3 (1.2%) |
|                   |            |        |         |       | Disallowed region: 9 (3.5%)         |
